# Supplementary material
Source: PubMed Central journal article supplement (PMC6342565)
Supplement: NIHMS961355-supplement-ONLINE_SUPPLEMENT.pdf [file NIHMS961355-supplement-ONLINE_SUPPLEMENT.pdf]

## **SUPPLEMENTAL MATERIAL**

Supplemental Figure I

Supplemental Table I

Supplemental Table II

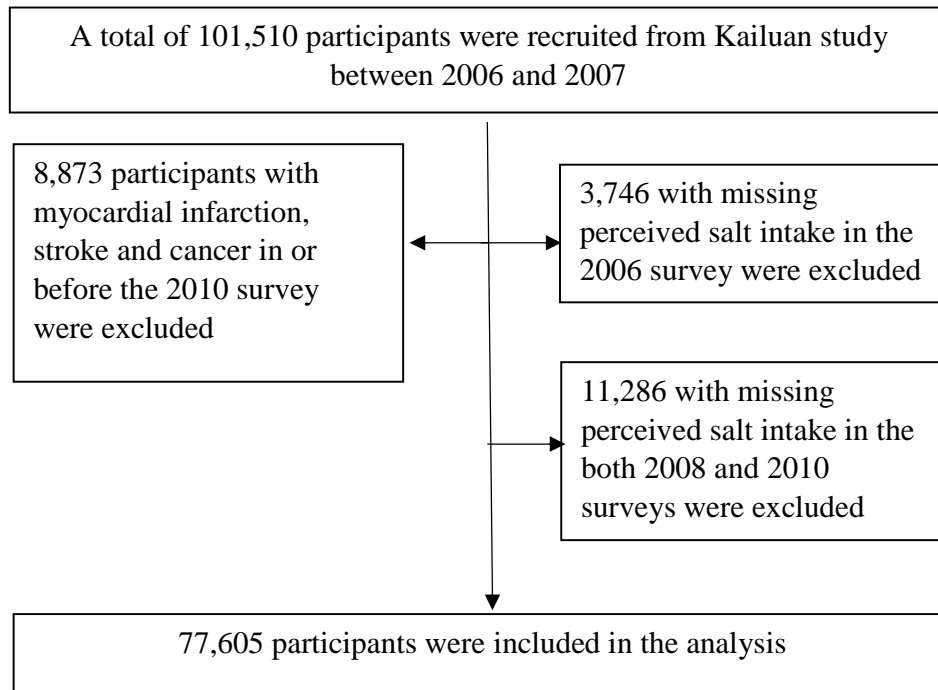

**Supplemental Figure I**

Participant flowchart of the study

**Supplemental Table I**

Characteristics of participants with vs. without salt data

|                                                | With salt data | Without salt data | P value |
|------------------------------------------------|----------------|-------------------|---------|
| N                                              | 77,605         | 15,032            |         |
| Age, year                                      | 53.6±12.0      | 62.5±12.8         | <0.001  |
| Women, %                                       | 22.2           | 13.7              | <0.001  |
| Smoking status, %                              |                |                   | <0.001  |
| Never                                          | 60.1           | 63.5              |         |
| Past                                           | 5.1            | 6.2               |         |
| Current                                        | 34.8           | 30.2              |         |
| Alcohol intake, %                              |                |                   | <0.001  |
| Never                                          | 65.2           | 72.8              |         |
| Past                                           | 3.6            | 4.3               |         |
| Light*                                         | 6.7            | 3.8               |         |
| Moderate*                                      | 4.5            | 4.3               |         |
| Heavy*                                         | 20.0           | 14.7              |         |
| Physical activity, %                           |                |                   | <0.001  |
| 3+ times/week                                  | 14.8           | 14.9              |         |
| 1-2 times/week                                 | 76.1           | 78.6              |         |
| Never                                          | 9.1            | 6.5               |         |
| Education, %                                   |                |                   | <0.001  |
| College /university                            | 7.6            | 4.8               |         |
| Middle school                                  | 83.7           | 79.6              |         |
| Illiteracy or elementary school                | 8.8            | 15.6              |         |
| Average income, %                              |                |                   | <0.001  |
| ≥¥3000/ month                                  | 6.8            | 5.8               |         |
| ¥500 to ¥2999/ month                           | 64.0           | 69.8              |         |
| <¥500/month                                    | 29.2           | 24.4              |         |
| Use of antihypertensive agent <sup>†</sup> , % | 16.5           | 12.3              | <0.001  |

|                                               |            |                   |        |
|-----------------------------------------------|------------|-------------------|--------|
| Use of lipid-lowering agents <sup>†</sup> , % | 1.8        | 0.7               | <0.001 |
| Use of hypoglycemic agents <sup>†</sup> , %   | 4.6        | 3.1               | <0.001 |
| Body mass index, kg/m <sup>2</sup>            | 25.0±3.4   | 24.9±3.6          | <0.001 |
| hs-CRP <sup>†,‡</sup> , mg/mL                 | 1.35(1.93) | 1.10(2.13)        | <0.001 |
| Fasting blood glucose <sup>†</sup> , mmol/L   | 5.56±1.39  | 5.61±1.82         | <0.001 |
| Total cholesterol <sup>†</sup> , mmol/L       | 4.98±0.89  | 4.97±1.11         | 0.38   |
| Triglycerides <sup>†,‡</sup> , mmol/L         | 1.32(0.96) | 1.27(0.97)        | 0.87   |
| HDL-C <sup>†</sup> , mmol/L                   | 1.53±0.33  | 1.57±0.41         | <0.001 |
| LDL-C <sup>†</sup> , mmol/L                   | 2.52±0.66  | 2.35±0.86         | <0.001 |
| Systolic blood pressure <sup>†</sup> , mmHg   | 130±17.5   | 135±21.3          | <0.001 |
| Diastolic blood pressure <sup>†</sup> , mmHg  | 84.0±9.6   | 84.4±11.5         | <0.001 |
| eGFR <sup>2</sup> , mL/min/1.73m <sup>2</sup> | 85.5±17.0  | 79.4±18.8         | <0.001 |
| Incident stroke case #                        | 1564       | 432               |        |
| Age- and sex-adjusted hazard ratio and 95% CI | 1 (ref)    | 0.91 (0.81,1.02)  | 0.09   |
| Fully adjusted hazard ratio and 95% CI        | 1 (ref)    | 1.01 (0.88, 1.15) | 0.92   |

\* Light drinker: 0.1-0.4 servings/day for women and 0.1-0.9 serving/day for men; moderate: 0.5-1.5 servings/day for women and 1-2 serving/day for men; heavy: >1.5 servings/day for women and >2 serving/day for men; based on 15g of alcohol per day.

<sup>†</sup> Average values based on measurements in 2006, 2008, and 2010.

<sup>‡</sup> Median (interquartile range).

Hs-CRP, high sensitivity C-reactive protein; HDL-C, high-density lipoprotein cholesterol; LDL-C, low-density lipoprotein cholesterol; eGFR, estimated glomerular filtration rate; CI: confidence interval.

## Supplemental Table II

Adjusted Hazard Ratios and 95% confidence intervals for risk of stroke, according to the salt intake trajectory patterns during 2006 to 2010, by sex, age or hypertension, among 77,605 Kailuan participants

|                                     | Moderate-<br>Stable | Moderate-<br>Decreasing | Moderate-<br>Increasing | Low-<br>Increasing | High-<br>Decreasing | <i>P</i><br>interaction |
|-------------------------------------|---------------------|-------------------------|-------------------------|--------------------|---------------------|-------------------------|
| <b>Men</b>                          |                     |                         |                         |                    |                     | 0.22                    |
| Case # /n                           | 1097/45707          | 128/7175                | 69/2518                 | 42/2195            | 66/2808             |                         |
| Incidence rate/1000 person yrs      | 4.99                | 3.60                    | 5.73                    | 3.98               | 4.90                |                         |
| Fully adjusted model 1 *            | 1.00                | 0.77(0.64,0.93)         | 1.07(0.84,1.37)         | 0.82(0.60,1.11)    | 0.98(0.76,1.26)     |                         |
| <b>Women</b>                        |                     |                         |                         |                    |                     |                         |
| Case # /n                           | 128/13534           | 13/2093                 | 3/457                   | 12/684             | 6/434               |                         |
| Incidence rate/1000 person yrs      | 1.96                | 1.26                    | 1.34                    | 3.71               | 2.94                |                         |
| Fully adjusted model 1 *            | 1.00                | 0.75(0.43,1.31)         | 0.61(0.19,1.92)         | 1.91(1.03,3.51)    | 1.35(0.58,3.10)     |                         |
| <b>Age≥60</b>                       |                     |                         |                         |                    |                     | 0.58                    |
| Case # /n                           | 645/18224           | 67/2319                 | 38/935                  | 28/935             | 38/876              |                         |
| Incidence rate/1000 person yrs      | 7.69                | 6.13                    | 8.81                    | 6.53               | 9.51                |                         |
| Fully adjusted model 2 <sup>†</sup> | 1.00                | 0.75(0.58,0.97)         | 1.09(0.79,1.52)         | 0.84(0.58,1.24)    | 1.11(0.79,1.53)     |                         |
| <b>Age&lt;60</b>                    |                     |                         |                         |                    |                     |                         |
| Case # /n                           | 580/41017           | 74/6949                 | 34/2040                 | 26/1944            | 34/2366             |                         |
| Incidence rate/1000 person yrs      | 2.88                | 2.12                    | 3.41                    | 2.74               | 2.95                |                         |
| Fully adjusted model 2 <sup>†</sup> | 1.00                | 0.79(0.62,1.01)         | 0.97(0.68,1.34)         | 1.03(0.70,1.54)    | 0.91(0.64,1.30)     |                         |
| <b>Hypertension</b>                 |                     |                         |                         |                    |                     | 0.08                    |

|                                             |            |                 |                 |                 |                 |      |
|---------------------------------------------|------------|-----------------|-----------------|-----------------|-----------------|------|
| Case # /n                                   | 836/23899  | 88/3736         | 43/1257         | 41/1086         | 48/1322         |      |
| Incidence rate/1000 person yrs              | 7.35       | 4.78            | 7.22            | 8.08            | 7.67            |      |
| Fully adjusted model 3 <sup>‡</sup>         | 1.00       | 0.67(0.54,0.84) | 0.89(0.66,1.21) | 1.04(0.76,1.42) | 0.93(0.69,1.25) |      |
| <b>Non-Hypertension</b>                     |            |                 |                 |                 |                 |      |
| Case # /n                                   | 389/35342  | 53/5532         | 29/1718         | 13/1793         | 24/1920         |      |
| Incidence rate/1000 person yrs              | 2.27       | 1.93            | 3.49            | 1.49            | 2.59            |      |
| Fully adjusted model 3 <sup>‡</sup>         | 1.00       | 0.97(0.73,1.29) | 1.40(0.96,2.05) | 0.70(0.40,1.22) | 1.21(0.80,1.84) |      |
| <b>eGFR &lt;60 mL/min/1.73m<sup>2</sup></b> |            |                 |                 |                 |                 | 0.45 |
| Case # /n                                   | 119/4550   | 11/540          | 8/176           | 4/153           | 6/145           |      |
| Incidence rate/1000 person yrs              | 5.57       | 4.18            | 10.07           | 5.54            | 9.02            |      |
| Fully adjusted model 1 <sup>*</sup>         | 1.00       | 0.90(0.48,1.69) | 1.70(0.82,3.50) | 1.02(0.37,2.81) | 1.40(0.60,3.29) |      |
| <b>eGFR ≥60 mL/min/1.73m<sup>2</sup></b>    |            |                 |                 |                 |                 |      |
| Case # /n                                   | 1106/54644 | 130/8726        | 64/2798         | 50/2722         | 66/3094         |      |
| Incidence rate/1000 person yrs              | 4.20       | 3.01            | 4.75            | 3.83            | 4.45            |      |
| Fully adjusted model 1 <sup>*</sup>         | 1.00       | 0.77(0.64,0.92) | 1.00(0.78,1.28) | 0.93(0.70,1.24) | 0.99(0.77,1.27) |      |

\* Adjusted for age, smoking (current, past, or never), alcohol intake (never, past, light, moderate, or heavy), education (illiteracy or elementary school, middle school, or college/university), physical activity (never, sometimes, or active), average monthly income of each family member (<¥500, ¥500 to ¥3000, or ≥¥3000), systolic blood pressure (≤120, 121-139, ≥140 mmHg), diastolic blood pressure (≤80, 81-89, ≥90 mmHg), estimated glomerular filtration rate(≤30, 31-59, 60-89, ≥90 mL/min/1.73m<sup>2</sup>), average concentration of triglycerides, high-density lipoprotein cholesterol, low-density lipoprotein cholesterol, high sensitivity C-reactive protein, fasting blood glucose and body mass index, use of antihypertensive, hypoglycemic, and lipid-lowering medications (yes/no for each).

† Adjusted for sex and variables in model 1.

‡ Adjusted for variables in model 2 except use of antihypertensive medications.
